# Supplementary material for: Distinguishing cancer cells from normal cells with an organelle-targeted fluorescent marker
Source: Royal Society of Chemistry journal article supplement (doi:10.1039/d2tb01351g), 2022-01-01
Supplement: d2tb01351g1.pdf [file d2tb01351g1.pdf]

## Distinguish cancer cells from normal cells by an organelle-targeted fluorescent marker

Hao-Chi Hao,<sup>a</sup> Gang Zhang,<sup>b</sup> Ya-Nan Wang,<sup>a</sup> Ru Sun,<sup>\*,a</sup> Yu-Jie Xu<sup>b</sup> and Jian-Feng Ge<sup>\*,a</sup>

<sup>a</sup> College of Chemistry, Chemical Engineering and Material Science, Soochow University, No. 199 Ren' Ai Road, Suzhou 215123, China.

<sup>b</sup> School of Radiation Medicine and Protection, Medical College of Soochow University, Soochow University, Suzhou 215123, China.

\*Corresponding author. E-mail addresses: ge\_jianfeng@hotmail.com (J.-F Ge), sunru924@hotmail.com (R. Sun)

### Index

|                                                                                                                                                                                                                                                                                                                                                                                                                                                                                                                    |    |
|--------------------------------------------------------------------------------------------------------------------------------------------------------------------------------------------------------------------------------------------------------------------------------------------------------------------------------------------------------------------------------------------------------------------------------------------------------------------------------------------------------------------|----|
| <b>1. FIGURES</b> .....                                                                                                                                                                                                                                                                                                                                                                                                                                                                                            | S3 |
| <b>Fig. S1</b> Double reciprocal plots: $1/(F-F_0)$ versus $1/[\beta\text{-CD}]$ . .....                                                                                                                                                                                                                                                                                                                                                                                                                           | S3 |
| <b>Fig. S2</b> The fluorescence intensity of probe <b>1</b> (10 $\mu\text{M}$ ) towards other interfering ions and biomolecules (1 mM) in double-distilled water containing 10% DMSO. ( $\lambda_{\text{ex}} = 509$ nm, slit widths: 3 nm/5 nm). .....                                                                                                                                                                                                                                                             | S3 |
| <b>Fig. S3</b> Fluorescence images of HeLa cells costaining with probe <b>1</b> (3 $\mu\text{M}$ ) and Green Mito-Tracker (3 $\mu\text{M}$ ). (a) Bright-field image; (b) confocal image (red channel) with probe <b>1</b> ; (c) confocal image (green channel) of Green Mito-Tracker; (d) merged image of (b) and (c); (e) fluorescence intensity of the regions of interest (ROI) across the HeLa cells. (f) fluorescence intensity correlation plot from the red channel and the green channel. ....            | S4 |
| <b>Fig. S4</b> Fluorescence images of HeLa cells costaining with probe <b>1</b> (3 $\mu\text{M}$ ) and Green Lysosome-Tracker (3 $\mu\text{M}$ ). (a) Bright-field image; (b) confocal image (red channel) with the probe <b>1</b> ; (c) confocal image (green channel) of Green Lysosome-Tracker; (d) merged image of (b) and (c); (e) fluorescence intensity of the regions of interest (ROI) across the HeLa cell. (f) fluorescence intensity correlation plot from the red channel and the green channel. .... | S4 |
| <b>Fig. S5</b> Fluorescence images of U87 cells costaining with probe <b>1</b> (3 $\mu\text{M}$ ) and Green Lysosome-Tracker (3 $\mu\text{M}$ ). (a) Bright-field image; (b) confocal image (red channel) with probe <b>1</b> ; (c) confocal image (green channel) of Green Lysosome-Tracker; (d) merged image of (b) and (c); (e) fluorescence intensity of the regions of interest (ROI) across the U87 cells. (f) fluorescence intensity correlation plot from the red channel and the green channel. ....      | S5 |
| <b>Fig. S6</b> Fluorescence images of AML cells costaining with probe <b>1</b> (3 $\mu\text{M}$ ) and Green ER-Tracker (3                                                                                                                                                                                                                                                                                                                                                                                          |    |

$\mu\text{M}$ ). (a) Bright-field image; (b) confocal image (red channel) with probe **1**; (c) confocal image (green channel) of Green ER-Tracker; (d) merged image of (b) and (c); (e) fluorescence intensity of the regions of interest (ROI) across the AML cells. (f) fluorescence intensity correlation plot from the red channel and the green channel. ....S5

**Fig. S7** Fluorescence images of B-2B cells costaining with probe **1** ( $3 \mu\text{M}$ ) and Green ER-Tracker ( $3 \mu\text{M}$ ). (a) Bright-field image; (b) confocal image (red channel) with probe **1**; (c) confocal image (green channel) of Green ER-Tracker; (d) merged image of (b) and (c); (e) fluorescence intensity of the regions of interest (ROI) across the B-2B cells. (f) fluorescence intensity correlation plot from the red channel and the green channel. ....S6

**Fig. S8** Average FL Intensity of cancer cells and normal cells incubated with probe **1** before and after adding  $\beta\text{-CD}$  ( $100 \mu\text{M}$ ). ....S6

**Fig. S9** Fluorescence images of HeLa cells costaining with probe **1** ( $0.3 \mu\text{M}$ ) and Green ER-Tracker ( $3 \mu\text{M}$ ). (a) Bright-field image; (b) confocal image (red channel) with probe **1** ( $0.3 \mu\text{M}$ ) after adding  $\beta\text{-CD}$  ( $100 \mu\text{M}$ ); (c) confocal image (green channel) of Green ER-Tracker; (d) merged image of (b) and (c); (e) fluorescence intensity of the regions of interest (ROI) across the HeLa cells. (f) fluorescence intensity correlation plot from the red channel and the green channel. ....S7

**2. APPENDIX** .....S8

**Fig. S10**  $^1\text{H}$  NMR spectrum of compound **3** ( $300 \text{ MHz}$ ,  $\text{DMSO-d}_6$ ). ....S8

**Fig. S11**  $^1\text{H}$  NMR spectrum of probe **1** ( $300 \text{ MHz}$ ,  $\text{DMSO-d}_6$ ). ....S8

**Fig. S12** HRMS ( $\text{ESI}^+$ ) spectrum of compound **3**. ....S9

**Fig. S13** HRMS ( $\text{ESI}^+$ ) spectrum of probe **1**. ....S10

**Fig. S14**  $^{13}\text{C}$  NMR spectrum of compound **3** ( $101\text{MHz}$ ,  $\text{DMSO-d}_6$ ). ....S11

**Fig. S15**  $^{13}\text{C}$  NMR spectrum of probe **1** ( $101\text{MHz}$ ,  $\text{DMSO-d}_6$ ). ....S11

## 1. FIGURES

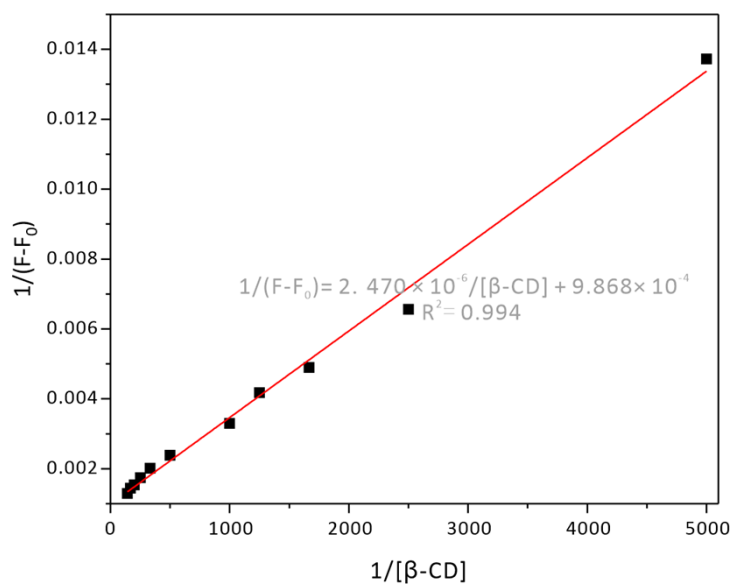

**Fig. S1** Double reciprocal plots:  $1/(F-F_0)$  versus  $1/[\beta\text{-CD}]$ .

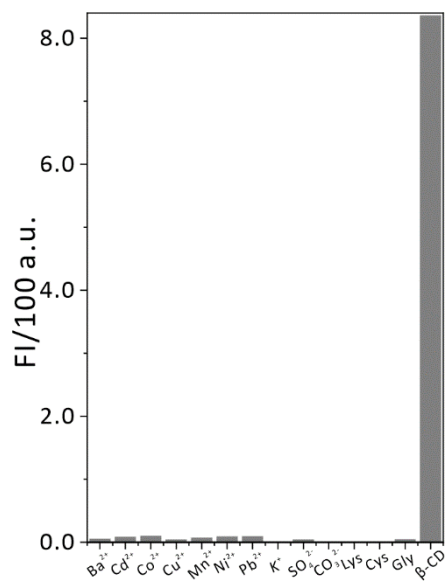

**Fig. S2** The fluorescence intensity of probe **1** (10 μM) towards other interfering ions and biomolecules (1 mM) in double-distilled water containing 10% DMSO. ( $\lambda_{\text{ex}} = 509$  nm, slit widths: 3 nm/5 nm).

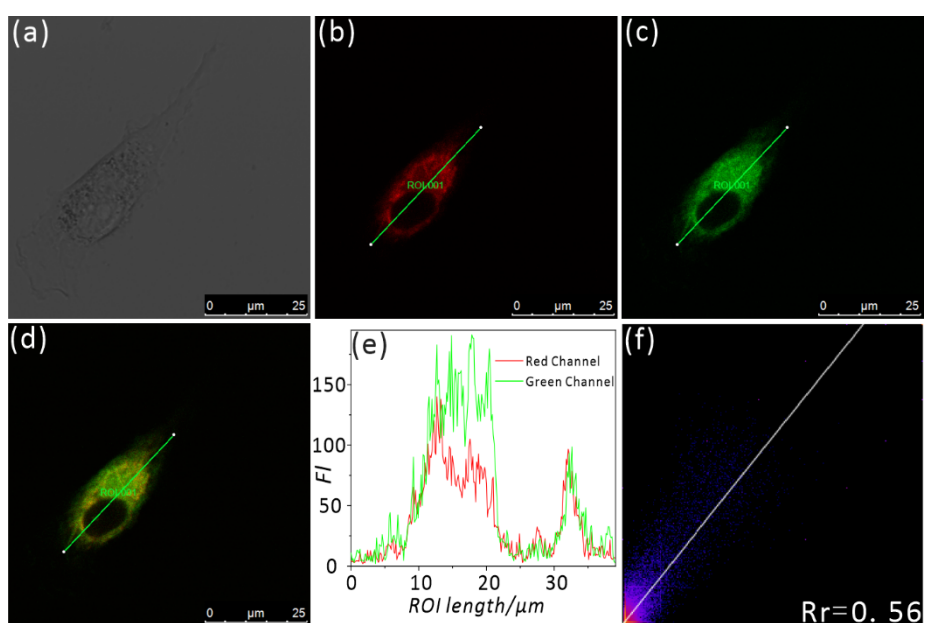

**Fig. S3** Fluorescence images of HeLa cells costaining with probe **1** (3  $\mu\text{M}$ ) and Green Mito-Tracker (3  $\mu\text{M}$ ). (a) Bright-field image; (b) confocal image (red channel) with probe **1**; (c) confocal image (green channel) of Green Mito-Tracker; (d) merged image of (b) and (c); (e) fluorescence intensity of the regions of interest (ROI) across the HeLa cells. (f) fluorescence intensity correlation plot from the red channel and the green channel.

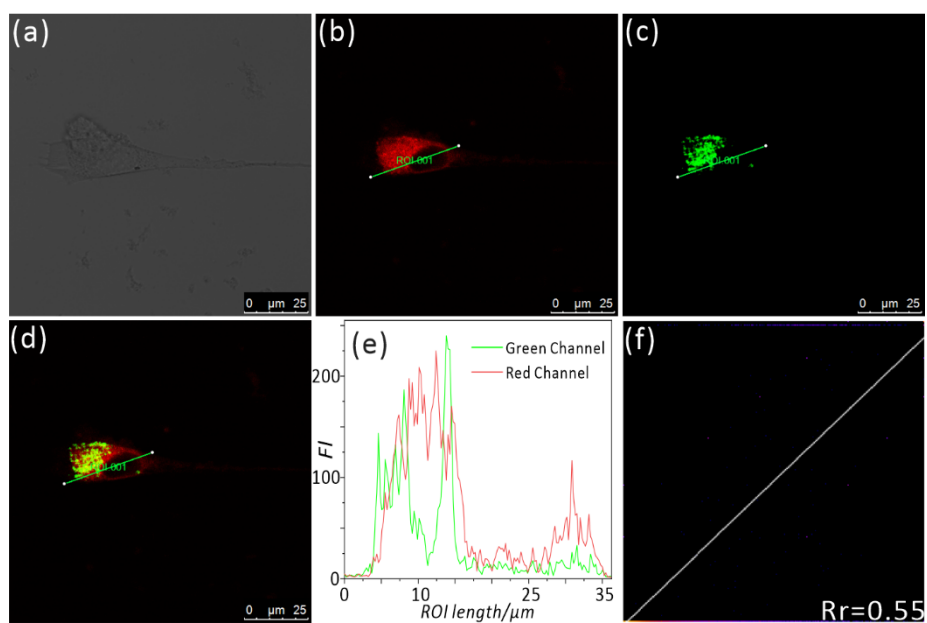

**Fig. S4** Fluorescence images of HeLa cells costaining with probe **1** (3  $\mu\text{M}$ ) and Green Lysosome-Tracker (3  $\mu\text{M}$ ). (a) Bright-field image; (b) confocal image (red channel) with probe **1**; (c) confocal image (green channel) of Green Lysosome-Tracker; (d) merged image of (b) and (c); (e) fluorescence intensity of the regions of interest (ROI) across the HeLa cells. (f) fluorescence intensity correlation plot from the red channel and the green channel.

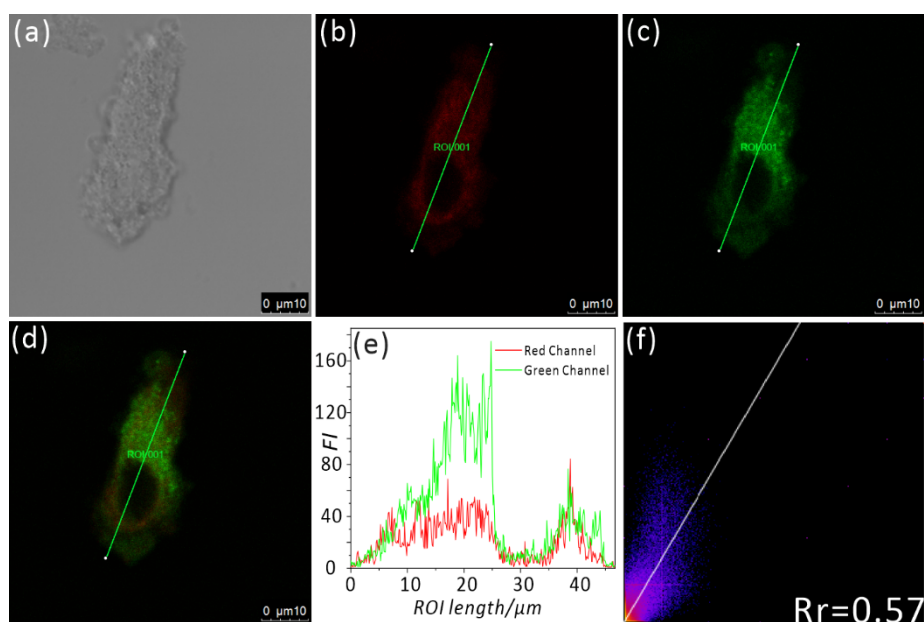

**Fig. S5** Fluorescence images of U87 cells costaining with probe **1** (3  $\mu\text{M}$ ) and Green Lysosome-Tracker (3  $\mu\text{M}$ ). (a) Bright-field image; (b) confocal image (red channel) with probe **1**; (c) confocal image (green channel) of Green Lysosome-Tracker; (d) merged image of (b) and (c); (e) fluorescence intensity of the regions of interest (ROI) across the U87 cells. (f) fluorescence intensity correlation plot from the red channel and the green channel.

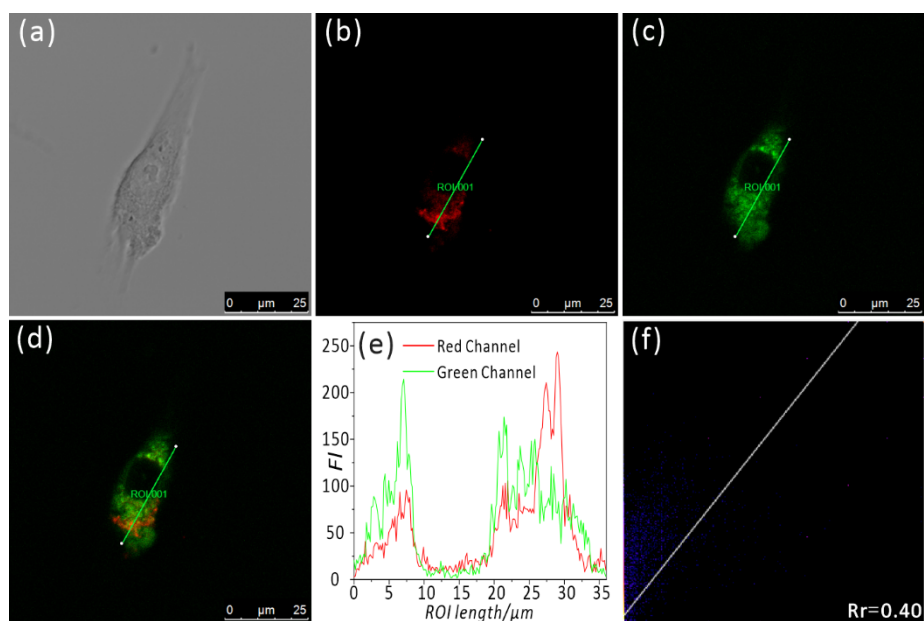

**Fig. S6** Fluorescence images of AML cells costaining with probe **1** (3  $\mu\text{M}$ ) and Green ER-Tracker (3  $\mu\text{M}$ ). (a) Bright-field image; (b) confocal image (red channel) with probe **1**; (c) confocal image (green channel) of Green ER-Tracker; (d) merged image of (b) and (c); (e) fluorescence intensity of the regions of interest (ROI) across the AML cells. (f) fluorescence intensity correlation plot from the red channel and the green channel.

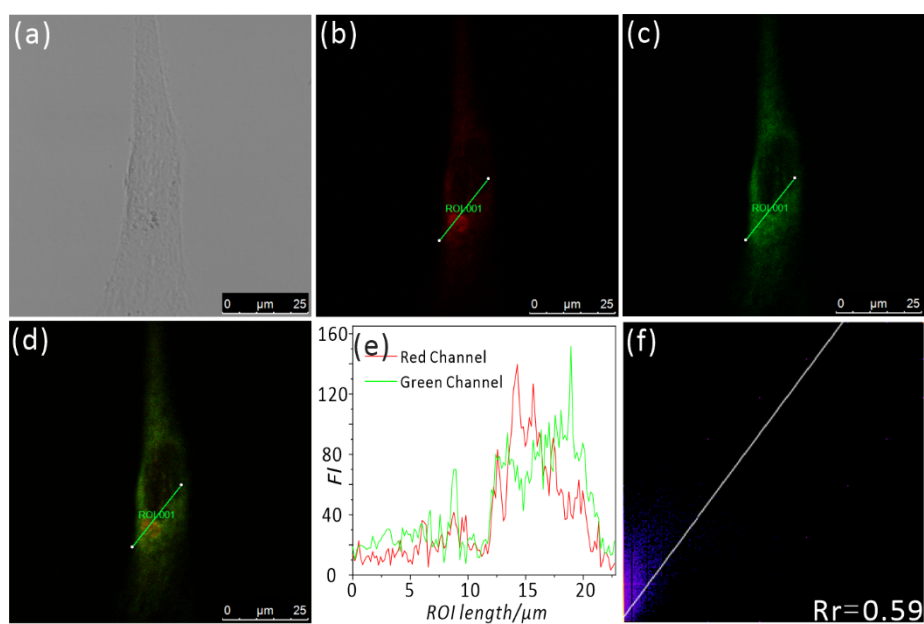

**Fig. S7** Fluorescence images of B-2B cells costaining with probe **1** (3 μM) and Green ER-Tracker (3 μM). (a) Bright-field image; (b) confocal image (red channel) with probe **1**; (c) confocal image (green channel) of Green ER-Tracker; (d) merged image of (b) and (c); (e) fluorescence intensity of the regions of interest (ROI) across the B-2B cells. (f) fluorescence intensity correlation plot from the red channel and the green channel.

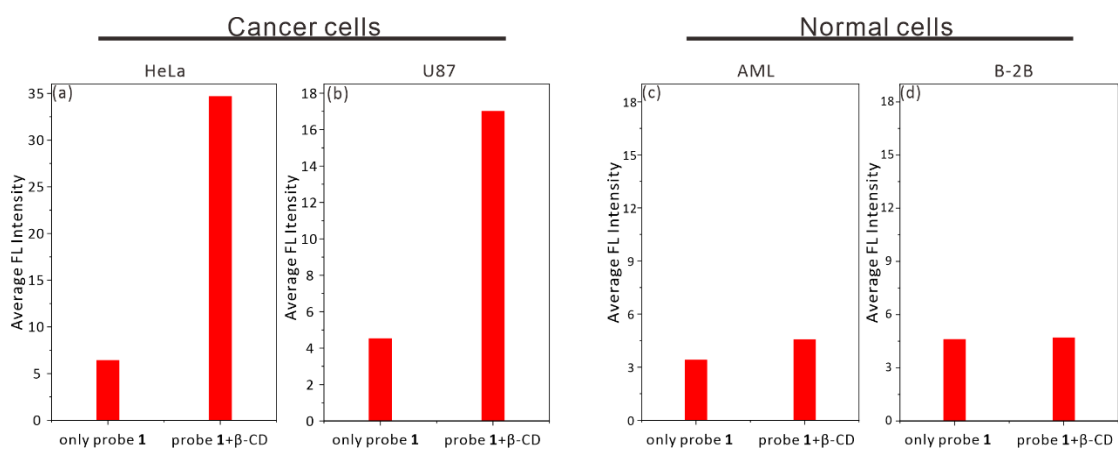

**Fig. S8** Average FL Intensity of cancer cells and normal cells incubated with probe **1** before and after adding β-CD (100 μM).

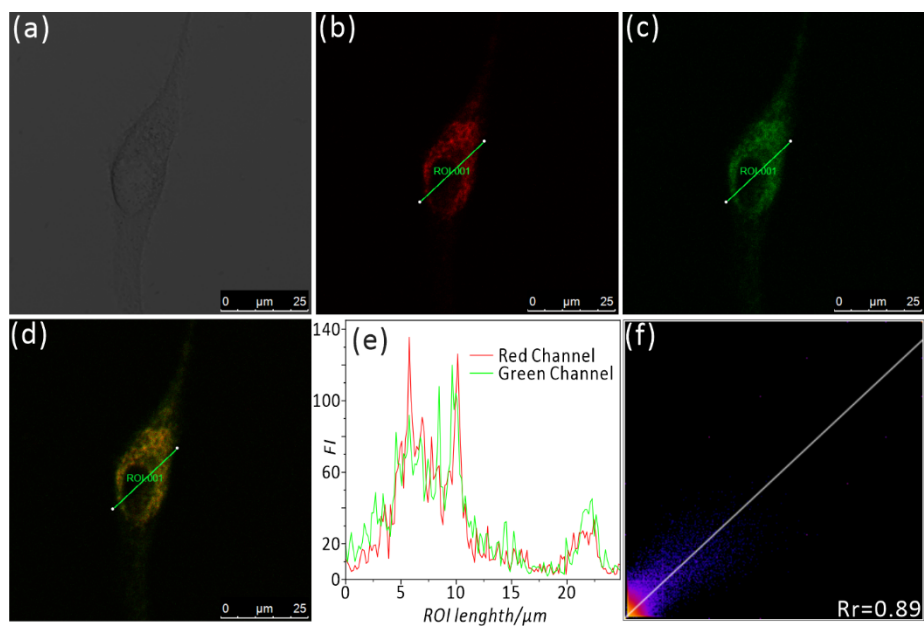

**Fig. S9** Fluorescence images of HeLa cells costaining with probe **1** (0.3 μM) and Green ER-Tracker (3 μM). (a) Bright-field image; (b) confocal image (red channel) with probe **1** (0.3 μM) after adding β-CD (100 μM); (c) confocal image (green channel) of Green ER-Tracker; (d) merged image of (b) and (c); (e) fluorescence intensity of the regions of interest (ROI) across the HeLa cells. (f) fluorescence intensity correlation plot from the red channel and the green channel.

## 2. APPENDIX

<sup>1</sup>H NMR (300 MHz, DMSO-d<sub>6</sub>)

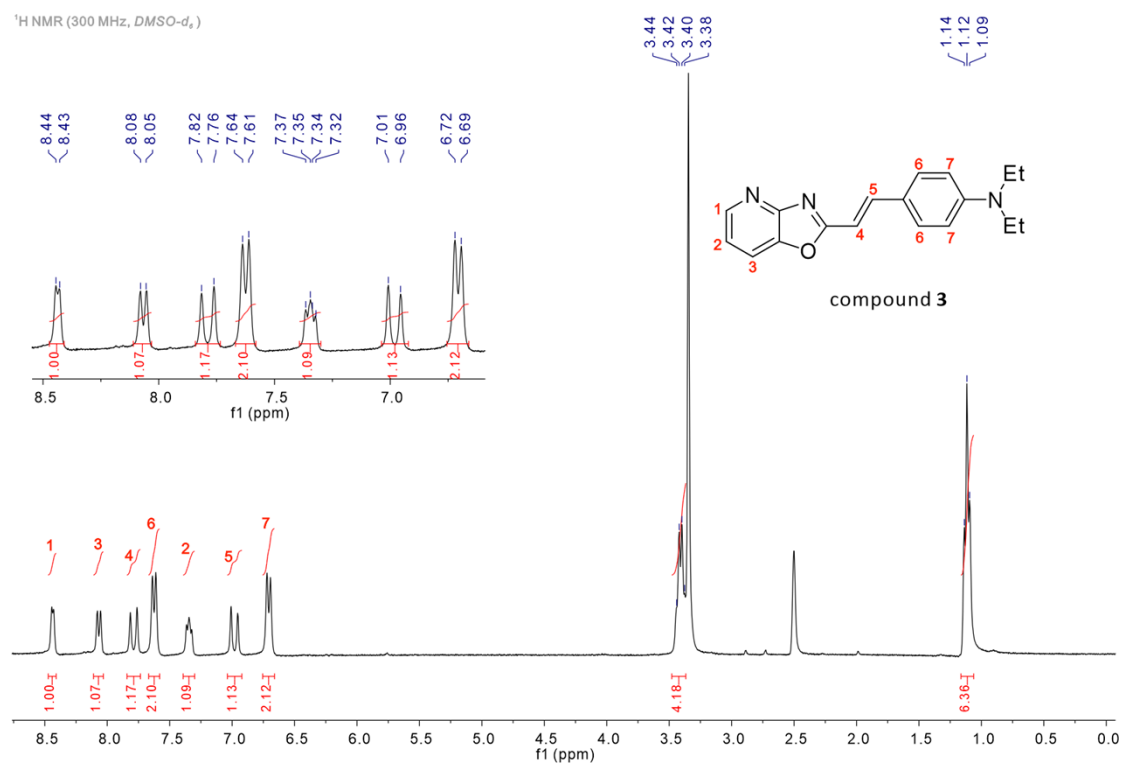

Fig. S10 <sup>1</sup>H NMR spectrum of compound 3 (300 MHz, DMSO-d<sub>6</sub>).

<sup>1</sup>H NMR (300 MHz, DMSO-d<sub>6</sub>)

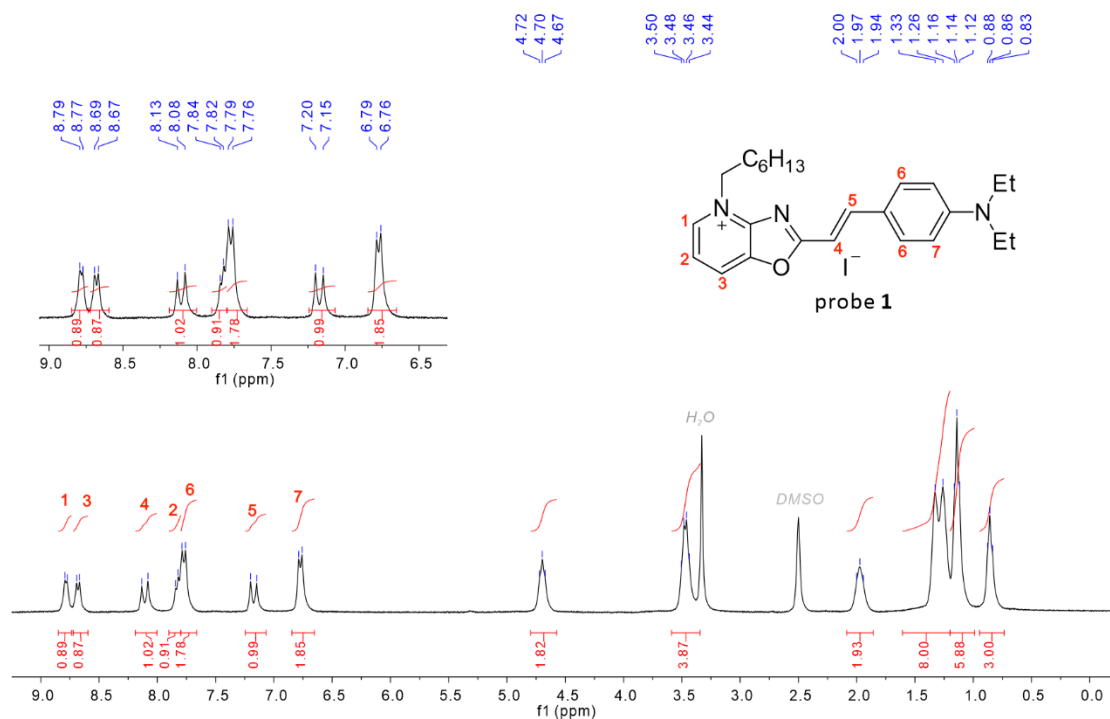

Fig. S11 <sup>1</sup>H NMR spectrum of probe 1 (300MHz, DMSO-d<sub>6</sub>).



**Analysis Info**

Analysis Name D:\Data\wlf\stu-sample\20211019\HHC-13\_BB7\_01\_21474.d  
Method 2011-lcms-ms\_20211202.m  
Sample Name HHC-13  
Comment

Acquisition Date 12/22/2021 10:27:20 PM

Operator bruker  
Instrument micrOTOF-Q III 8228888.20487

**Acquisition Parameter**

|             |          |                       |           |                  |           |
|-------------|----------|-----------------------|-----------|------------------|-----------|
| Source Type | ESI      | Ion Polarity          | Positive  | Set Nebulizer    | 0.6 Bar   |
| Focus       | Active   | Set Capillary         | 4500 V    | Set Dry Heater   | 180 °C    |
| Scan Begin  | 50 m/z   | Set End Plate Offset  | -500 V    | Set Dry Gas      | 4.0 l/min |
| Scan End    | 1500 m/z | Set Collision Cell RF | 250.0 Vpp | Set Divert Valve | Waste     |

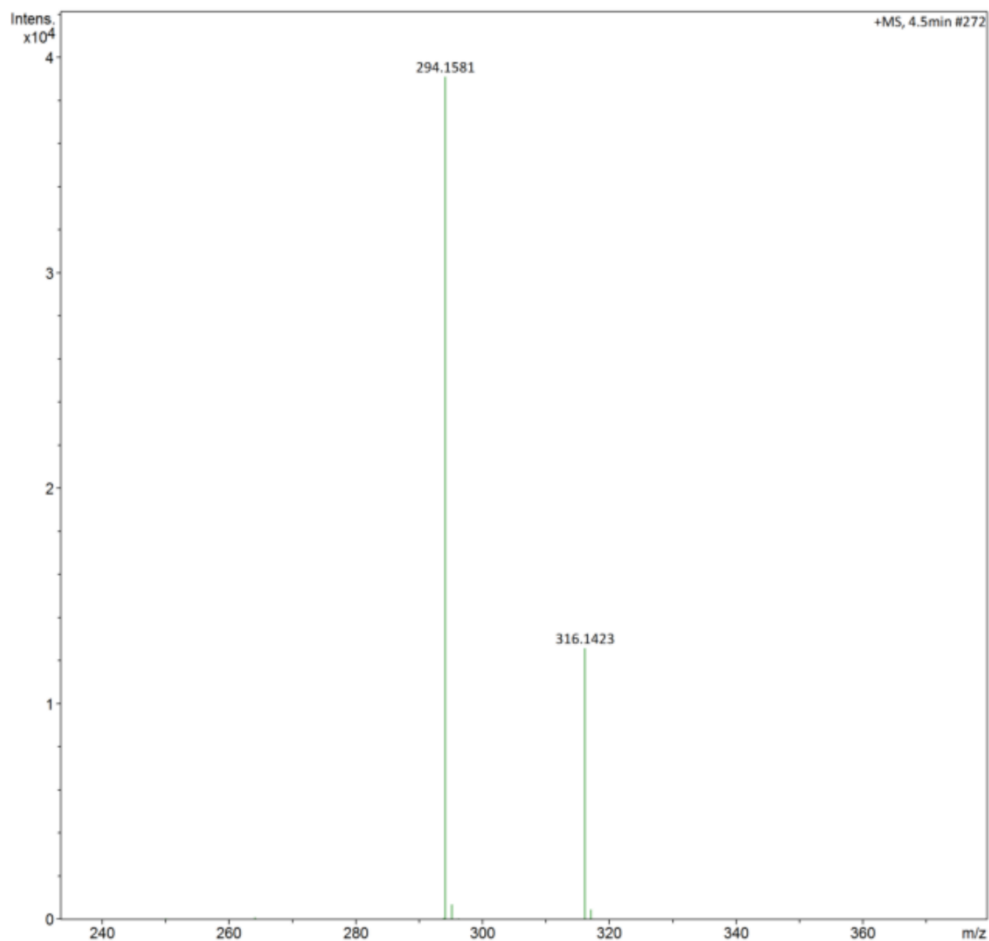

Fig. S12 HRMS (ESI<sup>+</sup>) spectrum of compound 3.

| Acquisition Parameter |          |                       |           |                  |           |
|-----------------------|----------|-----------------------|-----------|------------------|-----------|
| Source Type           | ESI      | Ion Polarity          | Positive  | Set Nebulizer    | 0.6 Bar   |
| Focus                 | Active   | Set Capillary         | 4500 V    | Set Dry Heater   | 180 °C    |
| Scan Begin            | 50 m/z   | Set End Plate Offset  | -500 V    | Set Dry Gas      | 4.0 l/min |
| Scan End              | 1500 m/z | Set Collision Cell RF | 250.0 Vpp | Set Divert Valve | Waste     |

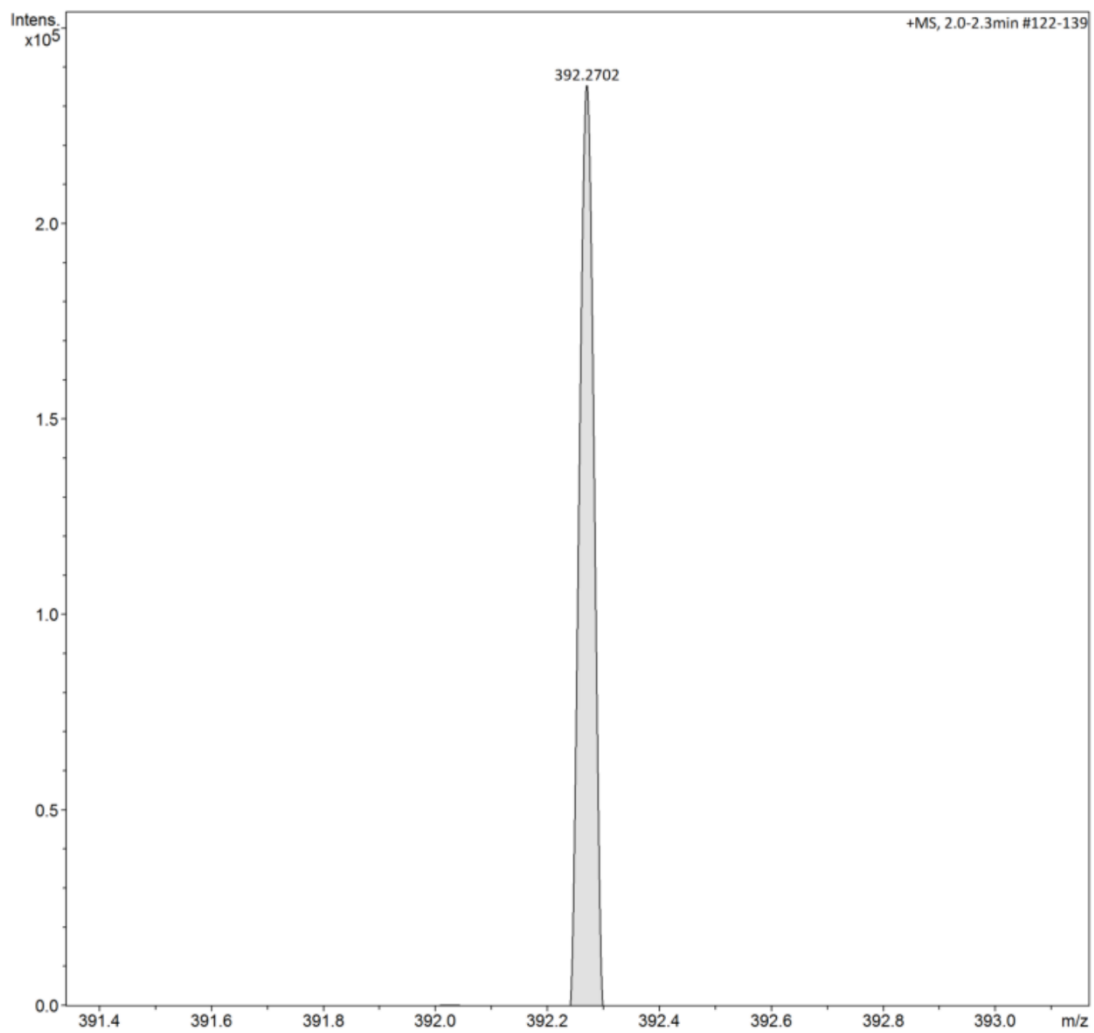

Fig. S13 HRMS (ESI<sup>+</sup>) spectrum of probe 1.

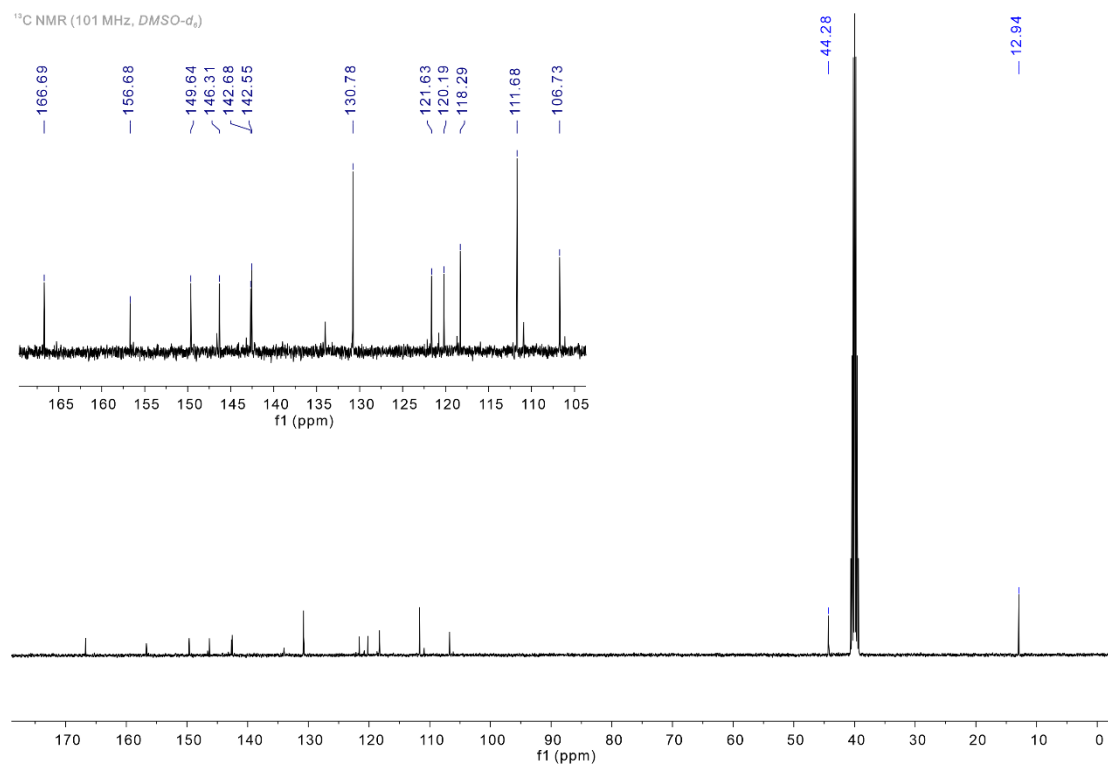

Fig. S14 <sup>13</sup>C NMR spectrum of compound **3** (101MHz, DMSO-d<sub>6</sub>).

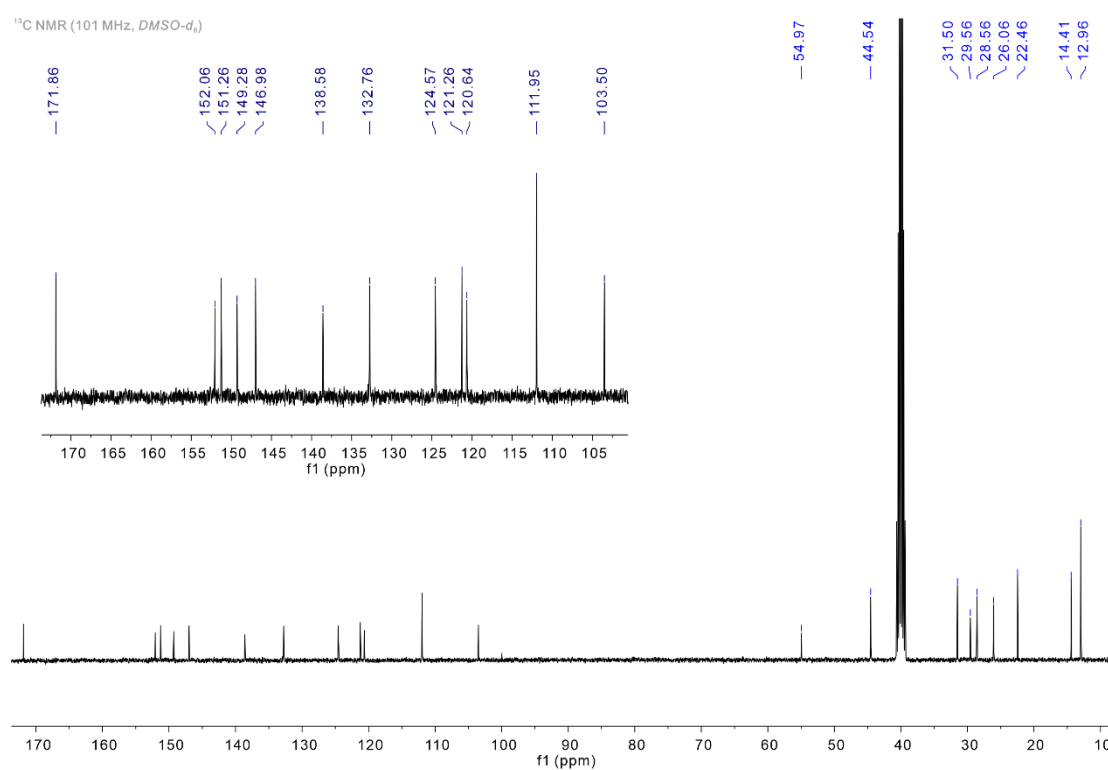

Fig. S15 <sup>13</sup>C NMR spectrum of probe **1** (101 MHz, DMSO-d<sub>6</sub>).
